# Supplementary material for: A Novel Indolium-Based Fluorescent Probe for Fast Detection of Cyanide
Source: MDPI journal article supplement (doi:10.3390/bios14050244), 2024-05-13

## A Novel Indolium-based Fluorescent Probe for Fast Detection of Cyanide

Mei Ding<sup>1</sup>, Xiao Xiao<sup>1</sup>, Chen Zhou <sup>1\*</sup>, Mingxin Luo<sup>1</sup> and Jing Sun<sup>1</sup>

<sup>1</sup> School of Chemistry & Environmental Engineering, Jilin Provincial International Joint Research Center of Photo-functional Materials and Chemistry, Changchun University of Science and Technology, Changchun, 130022, People's Republic of China

Corresponding author: Chen Zhou

E-mail address: zhouchen@cust.edu.cn

Tel: +86431 85583894

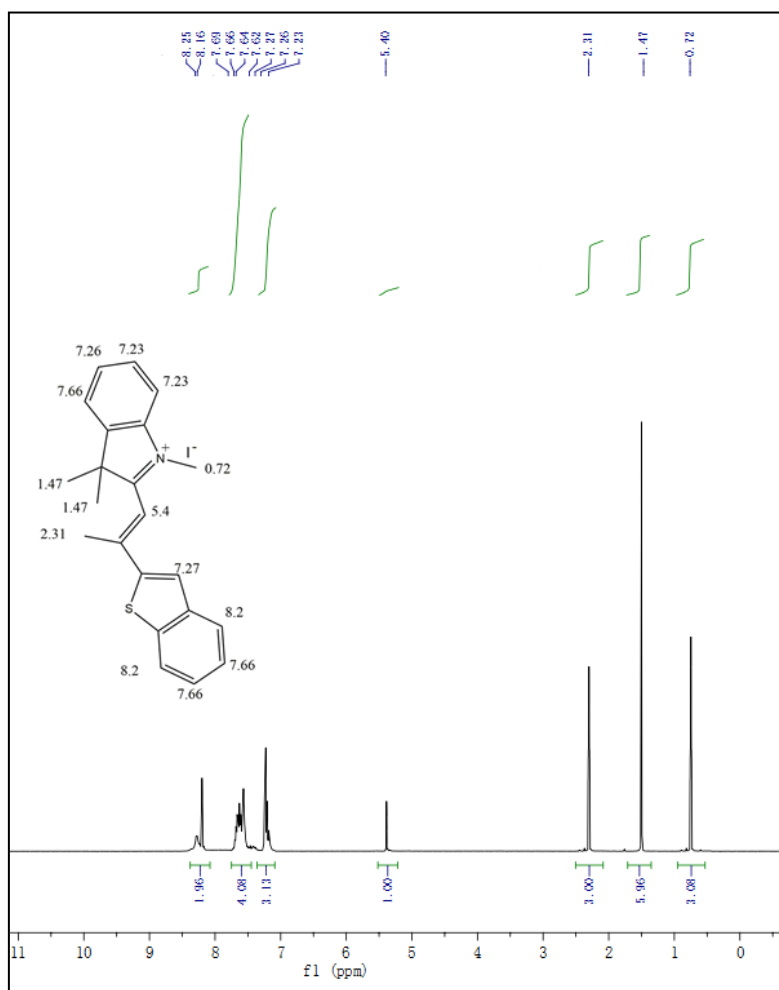

Figure S1. <sup>1</sup>H NMR spectrum of Probe 1

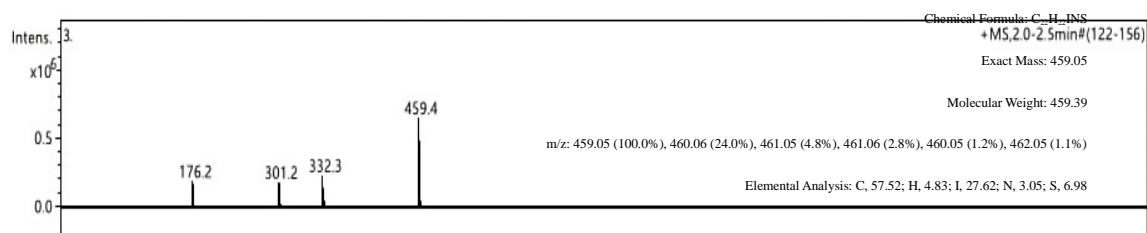

Supplement: s1 [file s1]
